# Supplementary figures and images for: Direct incorporation of the NKT-cell activator α-galactosylceramide into a recombinant Listeria monocytogenes improves breast cancer vaccine efficacy
Source: PubMed Central journal article supplement — Br J Cancer. 2014 Oct 14;111(10):1945–54. doi: 10.1038/bjc.2014.486 (PMC4229631; doi:10.1038/bjc.2014.486), 2014-10-14

Figure S2

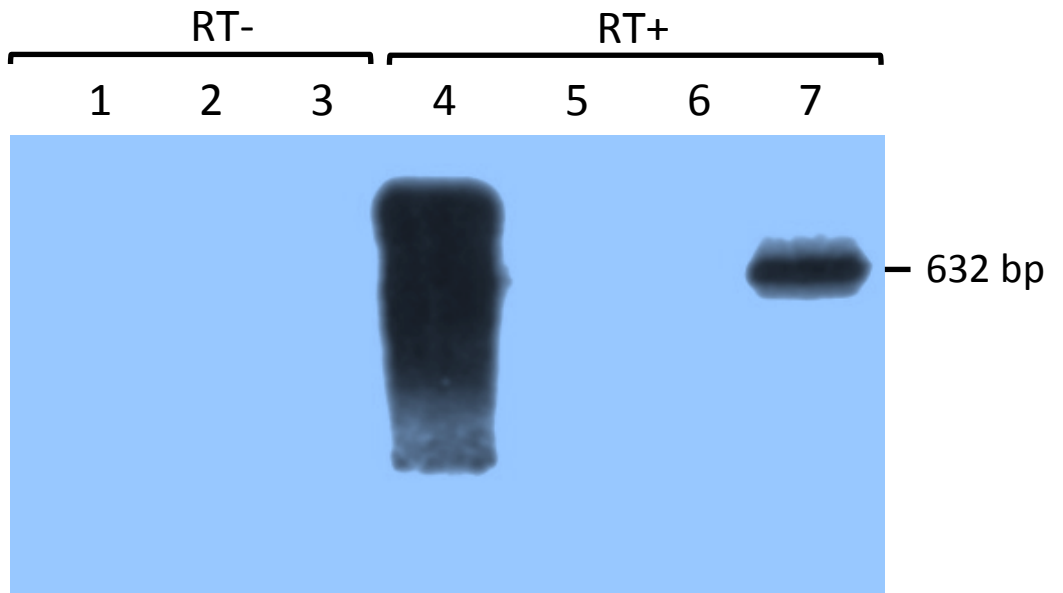

Supplement: bjc2014486x2.pdf [file bjc2014486x2.pdf]

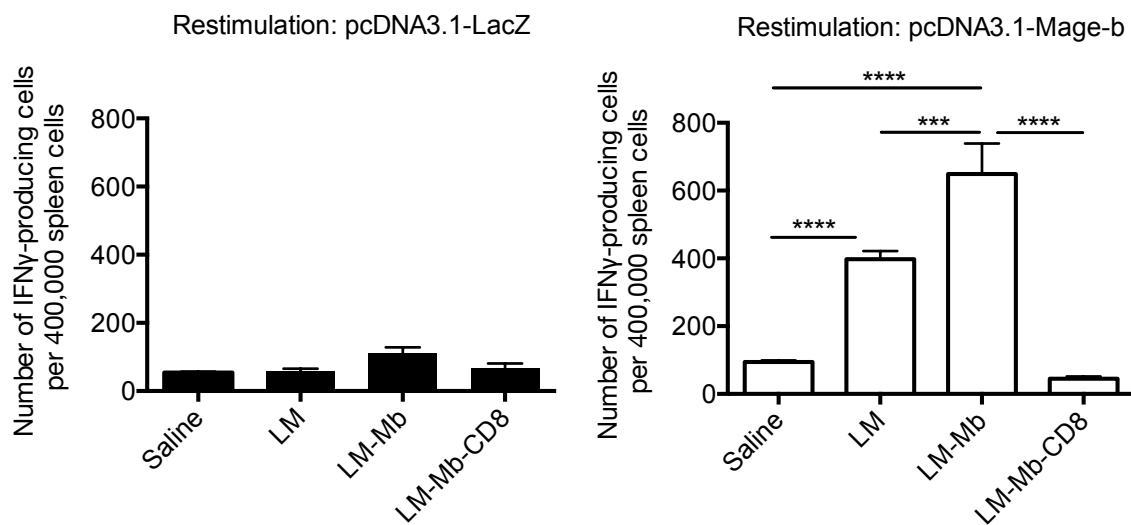

Supplement: bjc2014486x3.pdf [file bjc2014486x3.pdf]

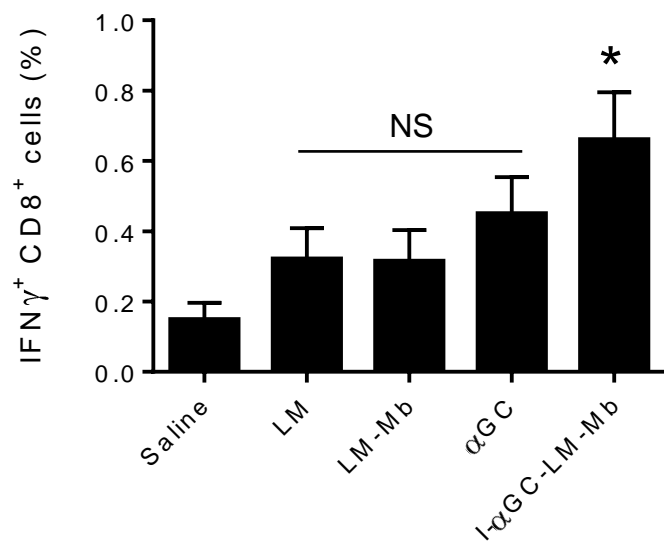

Supplement: bjc2014486x4.pdf [file bjc2014486x4.pdf]
